# Supplementary material for: Wie viel Digital Public Health steckt in Public-Health-Studiengängen? Eine systematische Modulhandbuchanalyse von Vollzeitstudiengängen an öffentlichen Hochschulen und Universitäten in Deutschland
Source: Springer Nature journal article supplement (doi:10.1007/s00103-024-03844-2), 2024-03-01
Supplement: MOESM1 [file 26808290]

## Onlinematerial

Beitrag von Albrecht et al. (Bundesgesundheitsblatt 3/2024)

**Tabelle Z1:** Kategoriensystem zur Inhaltsanalyse der Modulhandbücher

| Kategoriensystem                                                                                                                                                                                                                                      |
|-------------------------------------------------------------------------------------------------------------------------------------------------------------------------------------------------------------------------------------------------------|
| Public Health / Sozialmedizin <ul style="list-style-type: none"><li>• Public Health Profession</li><li>• Gesellschaftliche Transformation</li></ul>                                                                                                   |
| Public Health-Forschungsmethoden / Sozial- und Versorgungsforschung <ul style="list-style-type: none"><li>• Entwicklung und Evaluation</li><li>• Akzeptanzforschung</li><li>• Technikfolgenabschätzungen (iwS)</li><li>• Nutzerorientierung</li></ul> |
| Epidemiologie                                                                                                                                                                                                                                         |
| Gesundheitsförderung / Prävention / Gesundheitserziehung <ul style="list-style-type: none"><li>• Digitale Kompetenzen</li><li>• Gesundheitskompetenzen</li></ul>                                                                                      |
| Gesundheits- und Krankheitsdeterminanten / soziale Ungleichheit                                                                                                                                                                                       |
| Gesundheitsökonomie und -management <ul style="list-style-type: none"><li>• Finanzierung</li></ul>                                                                                                                                                    |
| Gesundheitspolitik und -system <ul style="list-style-type: none"><li>• eHealth / Gesundheitstelematik / Telemedizin</li><li>• Veränderungen Gesundheitssystem / -versorgung</li></ul>                                                                 |
| Querschnitt: IT und Technik                                                                                                                                                                                                                           |
| Querschnitt: Gesundheitskommunikation                                                                                                                                                                                                                 |
| Querschnitt: Ethik und Recht                                                                                                                                                                                                                          |

**Tabelle Z2:** Übersicht der Public Health-bezogenen Studiengänge mit digital Public Health-Bezug (N=16)

| ID | Hochschule / Universität                                             | Denomination des Studiengangs                                                | Veröffentlichungsdatum des Modulhandbuchs | Bachelor / Master | Gesamt Credit Points für Digital Public Health |
|----|----------------------------------------------------------------------|------------------------------------------------------------------------------|-------------------------------------------|-------------------|------------------------------------------------|
| A  | Hochschule Aalen - Technik und Wirtschaft                            | Gesundheitsmanagement                                                        | 23.02.2021                                | Bachelor          | 25                                             |
| B  | Alice Salomon Hochschule Berlin                                      | Management und Versorgung im Gesundheitswesen                                | 25.05.2020                                | Bachelor          | 5                                              |
| C  | Universität Bielefeld                                                | Health Communication                                                         | 22.02.2023                                | Bachelor          | 35                                             |
| D  | Hochschule für Gesundheit Bochum -<br>University of Applied Sciences | Gesundheitsdaten und Digitalisierung                                         | 26.05.2021                                | Bachelor          | 118                                            |
| E  |                                                                      | Pflege                                                                       | 28.11.2019                                | Bachelor          | 32                                             |
| F  | Technische Universität Dresden                                       | Gesundheitswissenschaften/Public Health                                      | Ohne Datum                                | Master            | 5                                              |
| G  | Hochschule Fulda - University of Applied<br>Sciences                 | Management in der Gesundheitsversorgung                                      | 19.01.2022                                | Bachelor          | 30                                             |
| H  |                                                                      | Interprofessionelles Management in der Gesundheitsversorgung                 | 29.11.2021                                | Master            | 5                                              |
| I  | Technische Hochschule Mittelhessen - THM<br>Gießen                   | Public Health                                                                | 04.12.2019                                | Master            | 24                                             |
| J  | Hochschule für Angewandte<br>Wissenschaften Hamburg                  | Gesundheitswissenschaften                                                    | 16.12.2021                                | Bachelor          | 10                                             |
| K  |                                                                      | Health Sciences                                                              | 18.11.2021                                | Master            | 17                                             |
| L  | Hochschule für angewandte<br>Wissenschaften Kempten                  | Gesundheitswirtschaft                                                        | 20.01.2021                                | Bachelor          | 21                                             |
| M  | Hochschule Niederrhein                                               | Health Care                                                                  | 23.09.2020                                | Master            | 6                                              |
| N  | Universität Siegen                                                   | Digital Biomedical and Health Sciences<br>(Vertiefung Digital Public Health) | 17.03.2022                                | Bachelor          | 117                                            |
| O  |                                                                      | Digital Public Health                                                        | 24.06.2022                                | Master            | 75                                             |
| P  | Hochschule Furtwangen                                                | Angewandte Gesundheitswissenschaften                                         | 27.01.2021                                | Bachelor          | 66                                             |
